# Supplementary material for: WOBTree: a write-optimized B+-tree for non-volatile memory
Source: Springer Nature journal article supplement (doi:10.1007/s11704-020-0228-1), 2021-07-16
Supplement: 11704_2020_228_MOESM1_ESM.pdf [file 11704_2020_228_MOESM1_ESM.pdf]

# WOBTree: a write-optimized B+-tree for non-volatile memory

**Haitao WANG, Zhanhuai LI, Xiao ZHANG,  
Xiaonan ZHAO, Song JIANG**

Frontiers of Computer Science, DOI: [10.1007/s11704-020-0228-1](https://doi.org/10.1007/s11704-020-0228-1)

# Problems & Ideas

- Problems of B+-tree on non-volatile memory (NVM)
  - Atomic granularity mismatch between CPU cache (usually 64B cache line) and NVM (usually 8 bytes failure-atomicity) can introduce write amplification and compromise data consistency of B+-trees
  - To ensure data consistency, a conventional B+-tree needs to flush half of the whole tree node on average even only one key-value pair is inserted or deleted, which increases write amplification and degrades write performance
- Ideas: A Write-Optimized B+-Tree for Non-Volatile Memory
  - Minimize the update granularity from a tree node to a smaller subnode
  - Carefully arranges the write operations in subnodes to ensure crash consistency and reduce write amplification

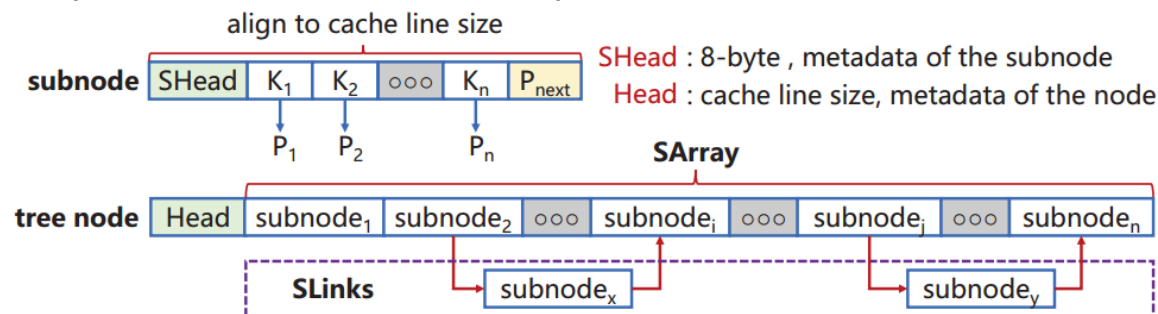

# Main Contributions

- WOBTree significantly reduce the write amplification

- FAST\_FAIR and wB+Tree are two B+-Tree variants on NVM
- WORT and WOART are two radix tree variants on NVM

| workload       | WOBTree | FAST_FAIR | WORT | WOART | wB+Tree |
|----------------|---------|-----------|------|-------|---------|
| Zipfian Insert | 1.46    | 6.54      | 5.37 | 5.85  | 30.75   |
| Zipfian Delete | 1.85    | 3.31      | 3.42 | 3.42  | 159.33  |
| Uniform Insert | 4.43    | 17.92     | 9.24 | 9.31  | 27.72   |
| Uniform Delete | 7.99    | 15.63     | 2.76 | 2.82  | 150.11  |

- WOBTree largely improve the write performance (Million Operations Per Second)

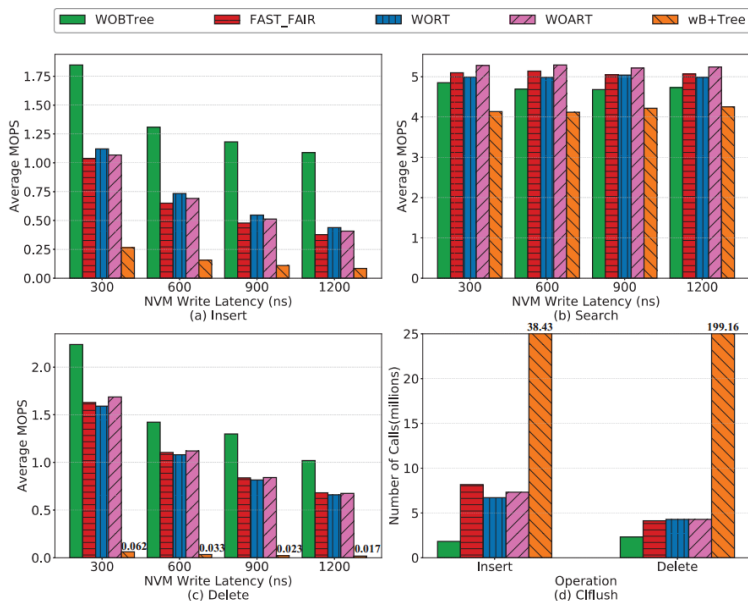

Performance comparison under the Zipfian workload.

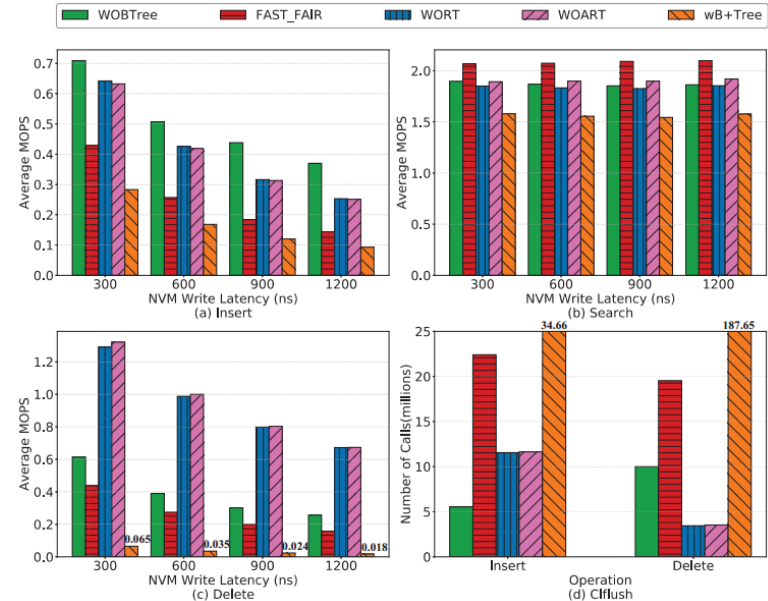

Performance comparison under the Uniform workload.
